# Supplementary material for: Preoperative transcranial direct current stimulation: Exploration of a novel strategy to enhance neuroplasticity before surgery to control postoperative pain. A randomized sham-controlled study
Source: PubMed Central journal article supplement (PMC5708693; doi:10.1371/journal.pone.0187013), 2017-11-30
Supplement: pone.0187013.s001.pdf [file pone.0187013.s001.pdf]

| Patient | time | group  | RA   | ANALG | WB    |
|---------|------|--------|------|-------|-------|
| 1.00    | 0.00 | 1.00   | 2.00 | 3.00  | 6.00  |
| 2.00    | 0.00 | 0.00   | 8.00 | 3.00  | 5.00  |
| 3.00    | 0.00 | 0.00   | 3.00 | 2.00  | 2.00  |
| 4.00    | 0.00 | 0.00   | 7.00 | 4.00  | 0.00  |
| 5.00    | 0.00 | 1.00   | 3.00 | 4.00  | 7.00  |
| 6.00    | 0.00 | 0.00   | 6.00 | 2.00  | 7.00  |
| 7.00    | 0.00 | 1.00   | 3.00 | 3.00  | 9.00  |
| 8.00    | 0.00 | 0.00   | 0.00 | 4.00  | 0.00  |
| 9.00    | 0.00 | 1.00   | 3.00 | 4.00  | 8.00  |
| 10.00   | 0.00 | 1.00   | 0.00 | 2.00  | 4.00  |
| 11.00   | 0.00 | 0.00   | 5.00 | 3.00  | 5.00  |
| 12.00   | 0.00 | 0.00   | 2.00 | 3.00  | 6.00  |
| 13.00   | 0.00 | 0.00   | 2.00 | 0.00  | 2.00  |
| 14.00   | 0.00 | 1.00   | 0.00 | 2.00  | 5.00  |
| 15.00   | 0.00 | 1.00   | 5.00 | 3.00  | 5.00  |
| 16.00   | 0.00 | 0.00   | 2.00 | 4.00  | 4.00  |
| 17.00   | 0.00 | 0.00   | 3.00 | 0.00  | 7.00  |
| 18.00   | 0.00 | 1.00   | 0.00 | 4.00  | 7.00  |
| 19.00   | 0.00 | 1.00   | 3.00 | 4.00  | 7.00  |
| 20.00   | 0.00 | 0.00   | 8.00 | 3.00  | 8.00  |
| 21.00   | 0.00 | #NULL! | 2.00 | 3.00  | 4.00  |
| 22.00   | 0.00 | 1.00   | 0.00 | 3.00  | 0.00  |
| 23.00   | 0.00 | 0.00   | 2.00 | 3.00  | 5.00  |
| 24.00   | 0.00 | 1.00   | 0.00 | 0.00  | 2.00  |
| 25.00   | 0.00 | 0.00   | 0.00 | 4.00  | 0.00  |
| 26.00   | 0.00 | 1.00   | 5.00 | 0.00  | 8.00  |
| 27.00   | 0.00 | 1.00   | 0.00 | 0.00  | 0.00  |
| 28.00   | 0.00 | 0.00   | 3.00 | 3.00  | 2.00  |
| 29.00   | 0.00 | 0.00   | 5.00 | 3.00  | 7.00  |
| 30.00   | 0.00 | 0.00   | 2.00 | 4.00  | 6.00  |
| 31.00   | 0.00 | 1.00   | 5.00 | 4.00  | 10.00 |
| 32.00   | 0.00 | 0.00   | 0.00 | 3.00  | 8.00  |
| 33.00   | 0.00 | 1.00   | 0.00 | 4.00  | 3.00  |
| 34.00   | 0.00 | 0.00   | 3.00 | 4.00  | 7.00  |
| 35.00   | 0.00 | 1.00   | 3.00 | 3.00  | 4.00  |
| 36.00   | 0.00 | 1.00   | 4.00 | 3.00  | 7.00  |
| 37.00   | 0.00 | 0.00   | 0.00 | 0.00  | 3.00  |
| 38.00   | 0.00 | 1.00   | 0.00 | 4.00  | 0.00  |
| 39.00   | 0.00 | 0.00   | 3.00 | 2.00  | 5.00  |
| 40.00   | 0.00 | 1.00   | 5.00 | 2.00  | 6.00  |
| 1.00    | 1.00 | 1.00   | 0.00 | 4.00  | 4.00  |
| 2.00    | 1.00 | 0.00   | 3.00 | 0.00  | 3.00  |
| 3.00    | 1.00 | 0.00   | 0.00 | 4.00  | 0.00  |
| 4.00    | 1.00 | 0.00   | 4.00 | 4.00  | 6.00  |
| 5.00    | 1.00 | 1.00   | 5.00 | 3.00  | 6.00  |
| 6.00    | 1.00 | 0.00   | 0.00 | 3.00  | 5.00  |

|       |      |      |      |      |       |
|-------|------|------|------|------|-------|
| 7.00  | 1.00 | 1.00 | 4.00 | 3.00 | 7.00  |
| 8.00  | 1.00 | 0.00 | 0.00 | 3.00 | 0.00  |
| 9.00  | 1.00 | 1.00 | 0.00 | 0.00 | 0.00  |
| 10.00 | 1.00 | 1.00 | 0.00 | 4.00 | 0.00  |
| 11.00 | 1.00 | 0.00 | 2.00 | 0.00 | 3.00  |
| 12.00 | 1.00 | 0.00 | 1.00 | 0.00 | 1.00  |
| 13.00 | 1.00 | 0.00 | 2.00 | 3.00 | 2.00  |
| 14.00 | 1.00 | 1.00 | 0.00 | 3.00 | 0.00  |
| 15.00 | 1.00 | 1.00 | 4.00 | 4.00 | 4.00  |
| 16.00 | 1.00 | 0.00 | 0.00 | 4.00 | 0.00  |
| 17.00 | 1.00 | 0.00 | 0.00 | 3.00 | 0.00  |
| 18.00 | 1.00 | 1.00 | 0.00 | 4.00 | 0.00  |
| 19.00 | 1.00 | 1.00 | 0.00 | 4.00 | 0.00  |
| 20.00 | 1.00 | 0.00 | 0.00 | 3.00 | 0.00  |
| 21.00 | 1.00 | 1.00 | 1.00 | 3.00 | 3.00  |
| 22.00 | 1.00 | 1.00 | 0.00 | 0.00 | 0.00  |
| 23.00 | 1.00 | 0.00 | 5.00 | 4.00 | 5.00  |
| 24.00 | 1.00 | 1.00 | 0.00 | 2.00 | 0.00  |
| 25.00 | 1.00 | 0.00 | 3.00 | 0.00 | 0.00  |
| 26.00 | 1.00 | 1.00 | 5.00 | 1.00 | 5.00  |
| 27.00 | 1.00 | 1.00 | 0.00 | 2.00 | 0.00  |
| 28.00 | 1.00 | 0.00 | 0.00 | 4.00 | 0.00  |
| 29.00 | 1.00 | 0.00 | 0.00 | 3.00 | 0.00  |
| 30.00 | 1.00 | 0.00 | 0.00 | 1.00 | 0.00  |
| 31.00 | 1.00 | 1.00 | 4.00 | 2.00 | 7.00  |
| 32.00 | 1.00 | 0.00 | 4.00 | 0.00 | 4.00  |
| 33.00 | 1.00 | 1.00 | 0.00 | 0.00 | 0.00  |
| 34.00 | 1.00 | 0.00 | 3.00 | 1.00 | 4.00  |
| 35.00 | 1.00 | 1.00 | 0.00 | 2.00 | 3.00  |
| 36.00 | 1.00 | 1.00 | 2.00 | 2.00 | 2.00  |
| 37.00 | 1.00 | 0.00 | 0.00 | 3.00 | 1.00  |
| 38.00 | 1.00 | 1.00 | 0.00 | 2.00 | 0.00  |
| 39.00 | 1.00 | 0.00 | 0.00 | 1.00 | 0.00  |
| 40.00 | 1.00 | 1.00 | 4.00 | 1.00 | 4.00  |
| 1.00  | 2.00 | 1.00 | 3.00 | 3.00 | 10.00 |
| 2.00  | 2.00 | 0.00 | 4.00 | 3.00 | 8.00  |
| 3.00  | 2.00 | 0.00 | 4.00 | 4.00 | 8.00  |
| 4.00  | 2.00 | 0.00 | 2.00 | 2.00 | 10.00 |
| 5.00  | 2.00 | 1.00 | 0.00 | 0.00 | 0.00  |
| 6.00  | 2.00 | 0.00 | 6.00 | 5.00 | 10.00 |
| 7.00  | 2.00 | 1.00 | 4.00 | 4.00 | 10.00 |
| 8.00  | 2.00 | 0.00 | 6.00 | 3.00 | 10.00 |
| 9.00  | 2.00 | 1.00 | 0.00 | 0.00 | 0.00  |
| 10.00 | 2.00 | 1.00 | 3.00 | 5.00 | 8.00  |
| 11.00 | 2.00 | 0.00 | 7.00 | 3.00 | 7.00  |
| 12.00 | 2.00 | 0.00 | 6.00 | 3.00 | 10.00 |
| 13.00 | 2.00 | 0.00 | 3.00 | 1.00 | 8.00  |

|       |      |      |      |      |       |
|-------|------|------|------|------|-------|
| 14.00 | 2.00 | 1.00 | 0.00 | 1.00 | 6.00  |
| 15.00 | 2.00 | 1.00 | 5.00 | 6.00 | 6.00  |
| 16.00 | 2.00 | 0.00 | 6.00 | 1.00 | 6.00  |
| 17.00 | 2.00 | 0.00 | 6.00 | 2.00 | 8.00  |
| 18.00 | 2.00 | 1.00 | 0.00 | 1.00 | 4.00  |
| 19.00 | 2.00 | 1.00 | 3.00 | 0.00 | 5.00  |
| 20.00 | 2.00 | 0.00 | 6.00 | 2.00 | 10.00 |
| 21.00 | 2.00 | 1.00 | 3.00 | 3.00 | 7.00  |
| 22.00 | 2.00 | 1.00 | 5.00 | 4.00 | 10.00 |
| 23.00 | 2.00 | 0.00 | 8.00 | 3.00 | 10.00 |
| 24.00 | 2.00 | 1.00 | 0.00 | 0.00 | 8.00  |
| 25.00 | 2.00 | 0.00 | 7.00 | 4.00 | 8.00  |
| 26.00 | 2.00 | 1.00 | 3.00 | 4.00 | 10.00 |
| 27.00 | 2.00 | 1.00 | 2.00 | 2.00 | 8.00  |
| 28.00 | 2.00 | 0.00 | 6.00 | 4.00 | 10.00 |
| 29.00 | 2.00 | 0.00 | 6.00 | 5.00 | 10.00 |
| 30.00 | 2.00 | 0.00 | 8.00 | 5.00 | 10.00 |
| 31.00 | 2.00 | 1.00 | 3.00 | 3.00 | 7.00  |
| 32.00 | 2.00 | 0.00 | 7.00 | 3.00 | 10.00 |
| 33.00 | 2.00 | 1.00 | 3.00 | 3.00 | 3.00  |
| 34.00 | 2.00 | 0.00 | 7.00 | 5.00 | 10.00 |
| 35.00 | 2.00 | 1.00 | 4.00 | 7.00 | 10.00 |
| 36.00 | 2.00 | 1.00 | 2.00 | 3.00 | 5.00  |
| 37.00 | 2.00 | 0.00 | 3.00 | 3.00 | 4.00  |
| 38.00 | 2.00 | 1.00 | 0.00 | 3.00 | 3.00  |
| 39.00 | 2.00 | 0.00 | 5.00 | 1.00 | 9.00  |
| 40.00 | 2.00 | 1.00 | 4.00 | 3.00 | 10.00 |
| 1.00  | 3.00 | 1.00 | 3.00 | 2.00 | 8.00  |
| 2.00  | 3.00 | 0.00 | 7.00 | 6.00 | 10.00 |
| 3.00  | 3.00 | 0.00 | 4.00 | 4.00 | 10.00 |
| 4.00  | 3.00 | 0.00 | 8.00 | 4.00 | 10.00 |
| 5.00  | 3.00 | 1.00 | 3.00 | 4.00 | 6.00  |
| 6.00  | 3.00 | 0.00 | 9.00 | 6.00 | 10.00 |
| 7.00  | 3.00 | 1.00 | 4.00 | 4.00 | 10.00 |
| 8.00  | 3.00 | 0.00 | 4.00 | 6.00 | 9.00  |
| 9.00  | 3.00 | 1.00 | 3.00 | 5.00 | 9.00  |
| 10.00 | 3.00 | 1.00 | 4.00 | 5.00 | 5.00  |
| 11.00 | 3.00 | 0.00 | 1.00 | 1.00 | 2.00  |
| 12.00 | 3.00 | 0.00 | 3.00 | 3.00 | 7.00  |
| 13.00 | 3.00 | 0.00 | 8.00 | 3.00 | 9.00  |
| 14.00 | 3.00 | 1.00 | 0.00 | 4.00 | 5.00  |
| 15.00 | 3.00 | 1.00 | 4.00 | 5.00 | 6.00  |
| 16.00 | 3.00 | 0.00 | 7.00 | 4.00 | 9.00  |
| 17.00 | 3.00 | 0.00 | 7.00 | 5.00 | 10.00 |
| 18.00 | 3.00 | 1.00 | 3.00 | 0.00 | 0.00  |
| 19.00 | 3.00 | 1.00 | 3.00 | 1.00 | 4.00  |
| 20.00 | 3.00 | 0.00 | 4.00 | 5.00 | 6.00  |

|       |      |      |      |      |       |
|-------|------|------|------|------|-------|
| 21.00 | 3.00 | 1.00 | 3.00 | 2.00 | 4.00  |
| 22.00 | 3.00 | 1.00 | 3.00 | 4.00 | 6.00  |
| 23.00 | 3.00 | 0.00 | 8.00 | 7.00 | 9.00  |
| 24.00 | 3.00 | 1.00 | 0.00 | 2.00 | 5.00  |
| 25.00 | 3.00 | 0.00 | 6.00 | 3.00 | 8.00  |
| 26.00 | 3.00 | 1.00 | 4.00 | 4.00 | 7.00  |
| 27.00 | 3.00 | 1.00 | 5.00 | 4.00 | 2.00  |
| 28.00 | 3.00 | 0.00 | 7.00 | 5.00 | 10.00 |
| 29.00 | 3.00 | 0.00 | 4.00 | 6.00 | 6.00  |
| 30.00 | 3.00 | 0.00 | 5.00 | 3.00 | 6.00  |
| 31.00 | 3.00 | 1.00 | 6.00 | 1.00 | 7.00  |
| 32.00 | 3.00 | 0.00 | 9.00 | 5.00 | 9.00  |
| 33.00 | 3.00 | 1.00 | 3.00 | 4.00 | 8.00  |
| 34.00 | 3.00 | 0.00 | 5.00 | 5.00 | 7.00  |
| 35.00 | 3.00 | 1.00 | 3.00 | 7.00 | 8.00  |
| 36.00 | 3.00 | 1.00 | 2.00 | 4.00 | 9.00  |
| 37.00 | 3.00 | 0.00 | 4.00 | 4.00 | 5.00  |
| 38.00 | 3.00 | 1.00 | 0.00 | 3.00 | 0.00  |
| 39.00 | 3.00 | 0.00 | 6.00 | 2.00 | 8.00  |
| 40.00 | 3.00 | 1.00 | 5.00 | 3.00 | 8.00  |
| 1.00  | 4.00 | 1.00 | 2.00 | 1.00 | 5.00  |
| 2.00  | 4.00 | 0.00 | 4.00 | 5.00 | 8.00  |
| 3.00  | 4.00 | 0.00 | 4.00 | 1.00 | 6.00  |
| 4.00  | 4.00 | 0.00 | 7.00 | 5.00 | 10.00 |
| 5.00  | 4.00 | 1.00 | 0.00 | 0.00 | 6.00  |
| 6.00  | 4.00 | 0.00 | 8.00 | 4.00 | 9.00  |
| 7.00  | 4.00 | 1.00 | 0.00 | 4.00 | 4.00  |
| 8.00  | 4.00 | 0.00 | 4.00 | 5.00 | 4.00  |
| 9.00  | 4.00 | 1.00 | 0.00 | 0.00 | 0.00  |
| 10.00 | 4.00 | 1.00 | 0.00 | 5.00 | 0.00  |
| 11.00 | 4.00 | 0.00 | 1.00 | 0.00 | 2.00  |
| 12.00 | 4.00 | 0.00 | 3.00 | 4.00 | 4.00  |
| 13.00 | 4.00 | 0.00 | 3.00 | 1.00 | 5.00  |
| 14.00 | 4.00 | 1.00 | 0.00 | 1.00 | 3.00  |
| 15.00 | 4.00 | 1.00 | 4.00 | 2.00 | 6.00  |
| 16.00 | 4.00 | 0.00 | 0.00 | 4.00 | 2.00  |
| 17.00 | 4.00 | 0.00 | 5.00 | 4.00 | 7.00  |
| 18.00 | 4.00 | 1.00 | 0.00 | 0.00 | 0.00  |
| 19.00 | 4.00 | 1.00 | 0.00 | 0.00 | 1.00  |
| 20.00 | 4.00 | 0.00 | 4.00 | 4.00 | 6.00  |
| 21.00 | 4.00 | 1.00 | 0.00 | 0.00 | 2.00  |
| 22.00 | 4.00 | 1.00 | 3.00 | 2.00 | 5.00  |
| 23.00 | 4.00 | 0.00 | 4.00 | 4.00 | 7.00  |
| 24.00 | 4.00 | 1.00 | 0.00 | 0.00 | 4.00  |
| 25.00 | 4.00 | 0.00 | 4.00 | 1.00 | 7.00  |
| 26.00 | 4.00 | 1.00 | 3.00 | 3.00 | 8.00  |
| 27.00 | 4.00 | 1.00 | 0.00 | 0.00 | 0.00  |

|       |      |      |      |      |       |
|-------|------|------|------|------|-------|
| 28.00 | 4.00 | 0.00 | 7.00 | 5.00 | 8.00  |
| 29.00 | 4.00 | 0.00 | 5.00 | 1.00 | 7.00  |
| 30.00 | 4.00 | 0.00 | 5.00 | 1.00 | 7.00  |
| 31.00 | 4.00 | 1.00 | 3.00 | 3.00 | 6.00  |
| 32.00 | 4.00 | 0.00 | 7.00 | 1.00 | 8.00  |
| 33.00 | 4.00 | 1.00 | 3.00 | 4.00 | 4.00  |
| 34.00 | 4.00 | 0.00 | 3.00 | 1.00 | 4.00  |
| 35.00 | 4.00 | 1.00 | 4.00 | 4.00 | 7.00  |
| 36.00 | 4.00 | 1.00 | 2.00 | 1.00 | 3.00  |
| 37.00 | 4.00 | 0.00 | 2.00 | 4.00 | 2.00  |
| 38.00 | 4.00 | 1.00 | 1.00 | 2.00 | 2.00  |
| 39.00 | 4.00 | 0.00 | 5.00 | 2.00 | 7.00  |
| 40.00 | 4.00 | 1.00 | 0.00 | 1.00 | 7.00  |
| 1.00  | 5.00 | 1.00 | 2.00 | 0.00 | 5.00  |
| 2.00  | 5.00 | 0.00 | 2.00 | 2.00 | 5.00  |
| 3.00  | 5.00 | 0.00 | 0.00 | 5.00 | 0.00  |
| 4.00  | 5.00 | 0.00 | 7.00 | 8.00 | 10.00 |
| 5.00  | 5.00 | 1.00 | 2.00 | 2.00 | 2.00  |
| 6.00  | 5.00 | 0.00 | 6.00 | 1.00 | 8.00  |
| 7.00  | 5.00 | 1.00 | 4.00 | 4.00 | 5.00  |
| 8.00  | 5.00 | 0.00 | 4.00 | 4.00 | 5.00  |
| 9.00  | 5.00 | 1.00 | 0.00 | 1.00 | 1.00  |
| 10.00 | 5.00 | 1.00 | 1.00 | 0.00 | 2.00  |
| 11.00 | 5.00 | 0.00 | 0.00 | 0.00 | 1.00  |
| 12.00 | 5.00 | 0.00 | 3.00 | 3.00 | 6.00  |
| 13.00 | 5.00 | 0.00 | 6.00 | 3.00 | 8.00  |
| 14.00 | 5.00 | 1.00 | 0.00 | 1.00 | 0.00  |
| 15.00 | 5.00 | 1.00 | 3.00 | 4.00 | 4.00  |
| 16.00 | 5.00 | 0.00 | 0.00 | 3.00 | 2.00  |
| 17.00 | 5.00 | 0.00 | 5.00 | 3.00 | 7.00  |
| 18.00 | 5.00 | 1.00 | 0.00 | 0.00 | 0.00  |
| 19.00 | 5.00 | 1.00 | 3.00 | 0.00 | 0.00  |
| 20.00 | 5.00 | 0.00 | 8.00 | 5.00 | 8.00  |
| 21.00 | 5.00 | 1.00 | 0.00 | 0.00 | 2.00  |
| 22.00 | 5.00 | 1.00 | 3.00 | 3.00 | 3.00  |
| 23.00 | 5.00 | 0.00 | 6.00 | 3.00 | 4.00  |
| 24.00 | 5.00 | 1.00 | 0.00 | 0.00 | 1.00  |
| 25.00 | 5.00 | 0.00 | 5.00 | 1.00 | 4.00  |
| 26.00 | 5.00 | 1.00 | 3.00 | 4.00 | 2.00  |
| 27.00 | 5.00 | 1.00 | 0.00 | 0.00 | 0.00  |
| 28.00 | 5.00 | 0.00 | 6.00 | 0.00 | 5.00  |
| 29.00 | 5.00 | 0.00 | 4.00 | 2.00 | 6.00  |
| 30.00 | 5.00 | 0.00 | 5.00 | 1.00 | 7.00  |
| 31.00 | 5.00 | 1.00 | 4.00 | 2.00 | 4.00  |
| 32.00 | 5.00 | 0.00 | 7.00 | 1.00 | 8.00  |
| 33.00 | 5.00 | 1.00 | 0.00 | 2.00 | 3.00  |
| 34.00 | 5.00 | 0.00 | 3.00 | 0.00 | 3.00  |

|       |      |      |      |      |      |
|-------|------|------|------|------|------|
| 35.00 | 5.00 | 1.00 | 3.00 | 3.00 | 3.00 |
| 36.00 | 5.00 | 1.00 | 0.00 | 1.00 | 4.00 |
| 37.00 | 5.00 | 0.00 | 5.00 | 4.00 | 5.00 |
| 38.00 | 5.00 | 1.00 | 4.00 | 2.00 | 2.00 |
| 39.00 | 5.00 | 0.00 | 6.00 | 2.00 | 5.00 |
| 40.00 | 5.00 | 1.00 | 0.00 | 0.00 | 3.00 |
| 1.00  | 6.00 | 1.00 | 1.00 | 0.00 | 2.00 |
| 2.00  | 6.00 | 0.00 | 5.00 | 5.00 | 5.00 |
| 3.00  | 6.00 | 0.00 | 5.00 | 0.00 | 4.00 |
| 4.00  | 6.00 | 0.00 | 5.00 | 6.00 | 2.00 |
| 5.00  | 6.00 | 1.00 | 2.00 | 5.00 | 3.00 |
| 6.00  | 6.00 | 0.00 | 3.00 | 0.00 | 4.00 |
| 7.00  | 6.00 | 1.00 | 0.00 | 4.00 | 2.00 |
| 8.00  | 6.00 | 0.00 | 0.00 | 4.00 | 0.00 |
| 9.00  | 6.00 | 1.00 | 3.00 | 2.00 | 1.00 |
| 10.00 | 6.00 | 1.00 | 0.00 | 0.00 | 0.00 |
| 11.00 | 6.00 | 0.00 | 5.00 | 0.00 | 1.00 |
| 12.00 | 6.00 | 0.00 | 7.00 | 4.00 | 7.00 |
| 13.00 | 6.00 | 0.00 | 5.00 | 1.00 | 5.00 |
| 14.00 | 6.00 | 1.00 | 0.00 | 0.00 | 0.00 |
| 15.00 | 6.00 | 1.00 | 4.00 | 0.00 | 5.00 |
| 16.00 | 6.00 | 0.00 | 0.00 | 2.00 | 2.00 |
| 17.00 | 6.00 | 0.00 | 3.00 | 3.00 | 5.00 |
| 18.00 | 6.00 | 1.00 | 0.00 | 0.00 | 0.00 |
| 19.00 | 6.00 | 1.00 | 0.00 | 0.00 | 0.00 |
| 20.00 | 6.00 | 0.00 | 5.00 | 0.00 | 0.00 |
| 21.00 | 6.00 | 1.00 | 0.00 | 0.00 | 1.00 |
| 22.00 | 6.00 | 1.00 | 2.00 | 1.00 | 3.00 |
| 23.00 | 6.00 | 0.00 | 1.00 | 2.00 | 2.00 |
| 24.00 | 6.00 | 1.00 | 0.00 | 0.00 | 1.00 |
| 25.00 | 6.00 | 0.00 | 5.00 | 1.00 | 7.00 |
| 26.00 | 6.00 | 1.00 | 3.00 | 2.00 | 5.00 |
| 27.00 | 6.00 | 1.00 | 0.00 | 0.00 | 0.00 |
| 28.00 | 6.00 | 0.00 | 4.00 | 0.00 | 4.00 |
| 29.00 | 6.00 | 0.00 | 4.00 | 3.00 | 7.00 |
| 30.00 | 6.00 | 0.00 | 5.00 | 0.00 | 7.00 |
| 31.00 | 6.00 | 1.00 | 0.00 | 3.00 | 3.00 |
| 32.00 | 6.00 | 0.00 | 0.00 | 0.00 | 0.00 |
| 33.00 | 6.00 | 1.00 | 0.00 | 4.00 | 3.00 |
| 34.00 | 6.00 | 0.00 | 5.00 | 1.00 | 6.00 |
| 35.00 | 6.00 | 1.00 | 3.00 | 3.00 | 5.00 |
| 36.00 | 6.00 | 1.00 | 0.00 | 0.00 | 1.00 |
| 37.00 | 6.00 | 0.00 | 2.00 | 3.00 | 3.00 |
| 38.00 | 6.00 | 1.00 | 0.00 | 2.00 | 0.00 |
| 39.00 | 6.00 | 0.00 | 5.00 | 1.00 | 8.00 |
| 40.00 | 6.00 | 1.00 | 3.00 | 1.00 | 5.00 |
| 1.00  | 7.00 | 1.00 | 1.00 | 0.00 | 3.00 |

|       |      |      |      |      |       |
|-------|------|------|------|------|-------|
| 2.00  | 7.00 | 0.00 | 1.00 | 3.00 | 3.00  |
| 3.00  | 7.00 | 0.00 | 0.00 | 0.00 | 0.00  |
| 4.00  | 7.00 | 0.00 | 6.00 | 7.00 | 6.00  |
| 5.00  | 7.00 | 1.00 | 2.00 | 1.00 | 2.00  |
| 6.00  | 7.00 | 0.00 | 3.00 | 0.00 | 3.00  |
| 7.00  | 7.00 | 1.00 | 0.00 | 0.00 | 2.00  |
| 8.00  | 7.00 | 0.00 | 0.00 | 2.00 | 2.00  |
| 9.00  | 7.00 | 1.00 | 5.00 | 6.00 | 5.00  |
| 10.00 | 7.00 | 1.00 | 0.00 | 0.00 | 0.00  |
| 11.00 | 7.00 | 0.00 | 0.00 | 0.00 | 3.00  |
| 12.00 | 7.00 | 0.00 | 3.00 | 3.00 | 5.00  |
| 13.00 | 7.00 | 0.00 | 2.00 | 0.00 | 4.00  |
| 14.00 | 7.00 | 1.00 | 0.00 | 0.00 | 0.00  |
| 15.00 | 7.00 | 1.00 | 3.00 | 1.00 | 4.00  |
| 16.00 | 7.00 | 0.00 | 0.00 | 0.00 | 3.00  |
| 17.00 | 7.00 | 0.00 | 9.00 | 2.00 | 10.00 |
| 18.00 | 7.00 | 1.00 | 0.00 | 0.00 | 0.00  |
| 19.00 | 7.00 | 1.00 | 0.00 | 0.00 | 0.00  |
| 20.00 | 7.00 | 0.00 | 0.00 | 0.00 | 0.00  |
| 21.00 | 7.00 | 1.00 | 0.00 | 0.00 | 2.00  |
| 22.00 | 7.00 | 1.00 | 1.00 | 0.00 | 3.00  |
| 23.00 | 7.00 | 0.00 | 1.00 | 3.00 | 2.00  |
| 24.00 | 7.00 | 1.00 | 0.00 | 0.00 | 0.00  |
| 25.00 | 7.00 | 0.00 | 3.00 | 1.00 | 5.00  |
| 26.00 | 7.00 | 1.00 | 3.00 | 3.00 | 4.00  |
| 27.00 | 7.00 | 1.00 | 0.00 | 0.00 | 0.00  |
| 28.00 | 7.00 | 0.00 | 3.00 | 0.00 | 5.00  |
| 29.00 | 7.00 | 0.00 | 4.00 | 3.00 | 8.00  |
| 30.00 | 7.00 | 0.00 | 3.00 | 0.00 | 7.00  |
| 31.00 | 7.00 | 1.00 | 3.00 | 0.00 | 0.00  |
| 32.00 | 7.00 | 0.00 | 0.00 | 0.00 | 4.00  |
| 33.00 | 7.00 | 1.00 | 0.00 | 1.00 | 2.00  |
| 34.00 | 7.00 | 0.00 | 6.00 | 2.00 | 7.00  |
| 35.00 | 7.00 | 1.00 | 3.00 | 4.00 | 5.00  |
| 36.00 | 7.00 | 1.00 | 0.00 | 1.00 | 3.00  |
| 37.00 | 7.00 | 0.00 | 2.00 | 3.00 | 5.00  |
| 38.00 | 7.00 | 1.00 | 0.00 | 1.00 | 1.00  |
| 39.00 | 7.00 | 0.00 | 4.00 | 1.00 | 7.00  |
| 40.00 | 7.00 | 1.00 | 0.00 | 1.00 | 4.00  |
